# Supplementary material for: A facile approach to fabricate free-standing hydrogen evolution electrodes: riveting tungsten carbide nanocrystals to graphite felt fabrics by carbon nanosheets
Source: Royal Society of Chemistry journal article supplement (doi:10.1039/c6ta01236a), 2016-01-01
Supplement: c6ta01236a1.pdf [file c6ta01236a1.pdf]

## Supporting Information

### High-performance free-standing hydrogen evolution electrodes: riveting tungsten carbide nanocrystals to graphite felt fabrics by carbon nanosheets

Yi Shen\*, Ling Li, Jingyu Xi\* and Xinping Qiu\*

#### Experimental Section

*Synthesis of CNS@WC/GF* CNS@WC/GF monoliths were synthesized via in-situ carburization of PTA-loaded GF fabrics in the presence of methane. Prior to synthesis, graphite felt monoliths with a dimension of  $1.5 \times 1.5 \times 0.5$  cm were thermally treated using a muffle furnace at 430 °C for 24 h. 1 g of PTA powder and 20 mL of ethanol were added into a petri dish to form a solution. 10 pieces of activated graphite felts were immersed into the solution. To transfer PTA into graphite felts, the solvent, *i.e.*, ethanol was slowly evaporated at 40 °C overnight. After the complete evaporation of ethanol, most of the PTA was deposited into graphite felts. The resulting PTA-loaded GF monoliths were transferred into a quartz tube reactor.<sup>1</sup> The system was flushed with nitrogen gas (purity > 99.99%) to remove the air and the reactor was heated to 600 °C with a ramp rate of 2 °C min<sup>-1</sup> under nitrogen flow (flow rate: 50 mL min<sup>-1</sup>). Then, methane gas (purity > 99.9%) was introduced into the reactor with a flow rate of 50 mL min<sup>-1</sup>. Meanwhile, the reactor was heated to 900 °C and hold at this temperature for 4 h. Subsequently, the reactor was cooled to ambient temperature at a rate of 2 °C min<sup>-1</sup>.

*Structural Characterization* A field emission scanning electron microscope (FESEM) (JSM-7600F, JEOL) and transmission electron microscope (TEM) (JEM2010, JEOL) were used to observe the morphologies of the samples. An EDX analyzer equipped in the FESEM and an axis-ultra X-ray photoelectron spectrometer with monochromatized Al-K $\alpha$  radiation were used to analyze the elemental composition of the samples. X-ray diffraction (XRD) patterns were obtained by a diffractometer (PW1830, Philips) equipped with Cu-K $\alpha$  radiation of 1.54 Å. Raman spectra were recorded with a Renishaw Raman microscope using 633-nm

excitation at room temperature. To prepare the samples for Raman tests, the CNS@WC was detached from the GF support by intense ultrasonication. The isolated carbon nanosheets were obtained using a sedimentation separation method. The resulting CNS@WC and isolated carbon nanosheets were deposited to silicon wafers and characterized by Raman spectroscopy. For each sample, at least five tests were conducted at different locations. The N<sub>2</sub> adsorption–desorption isotherm was obtained using the accelerated surface area porosimetry system (ASAP 2020, Micromeritics). Thermogravimetric analyses (TGA) were conducted at a temperature range of 50 to 1000°C using a heating rate of 20°C min<sup>-1</sup> under air flow.

*Electrochemical measurements* Electrochemical measurements were performed on an electrochemical station equipped with a three-electrode cell as described in our previous work.<sup>2</sup> Prior to test, CNS@WC/GF monoliths were electrochemically activated to enhance the hydrophilicity. A piece of CNS@WC/GF monolith mounted by a home-made clamper was used as working electrode. A saturated calomel electrode (SCE) and graphite plate were used as reference and counter electrodes, respectively. For comparison, a commercial Pt plate (effective geometric area 1 × 1 cm) was also tested. The details of experimental procedures were reported in our previous work. In the experiments, the electrolyte (1M KOH or 1M H<sub>2</sub>SO<sub>4</sub>) was bubbled with nitrogen gas (purity > 99.99%) and subjected to continuous magnetic stirring. All the potentials reported in this work were referenced to a reversible hydrogen electrode (RHE) by adding a value of (0.241 + 0.059 pH) V. All the electrochemical measurements were conducted at room temperature (298 ± 1 K).

**Table S1** Summary of catalytic performance of tungsten carbide-based HER catalysts in acidic solutions

| Sample                                                                 | Catalytic performance                                                                                                          | Experimental conditions                                                                                       | Ref.      |
|------------------------------------------------------------------------|--------------------------------------------------------------------------------------------------------------------------------|---------------------------------------------------------------------------------------------------------------|-----------|
| WC-CNTs                                                                | $\eta_0$ : 15 mV; $\eta_{10}$ : 145 mV; $j_{300\text{ mV}}$ : 117.6 mA cm <sup>-2</sup> ; Tafel slope: 72 mV dec <sup>-1</sup> | Electrolyte: 0.5 M H <sub>2</sub> SO <sub>4</sub> ; Scan rate: 50 mV s <sup>-1</sup>                          | 3         |
| Porous WC films                                                        | $\eta_0$ : 120 mV; Tafel slope: 76 mV dec <sup>-1</sup> ;                                                                      | Electrolyte: 0.5 M H <sub>2</sub> SO <sub>4</sub> ; Scan rate: 5 mV s <sup>-1</sup>                           | 4         |
| GnP-supported tungsten carbide–nitride                                 | $\eta_{10}$ : 120 mV; Tafel slope: 68.6 mV dec <sup>-1</sup>                                                                   | Electrolyte: 0.1 M HClO <sub>4</sub> ; Scan rate 2 mV s <sup>-1</sup>                                         | 5         |
| Bulk W <sub>2</sub> C:                                                 | $\eta_{10}$ : 336 mV; Tafel slope: 88.0 mV dec <sup>-1</sup>                                                                   |                                                                                                               |           |
| W <sub>2</sub> C/XC                                                    | $\eta_{10}$ : 223 mV                                                                                                           |                                                                                                               |           |
| W <sub>2</sub> C/GnP                                                   | $\eta_{10}$ : 186 mV; Tafel slope: 64.7 mV dec <sup>-1</sup>                                                                   |                                                                                                               |           |
| WC microspheres                                                        | $\eta_0$ : 80 mV; Tafel slope: 89 mV dec <sup>-1</sup> ; $j_0$ : 0.179 mA cm <sup>-2</sup>                                     | Electrolyte: 0.5 M H <sub>2</sub> SO <sub>4</sub> ; Scanning rate: 5 mV s <sup>-1</sup>                       | 6         |
| WC-CNT                                                                 | $\eta_{10}$ : 489 mV; Tafel slope: 122 mV dec <sup>-1</sup>                                                                    | Electrolyte: 0.05 M H <sub>2</sub> SO <sub>4</sub> ; Scan rate: 10 mV s <sup>-1</sup>                         | 7         |
| W-CNT                                                                  | $\eta_{10}$ : 435 mV; Tafel slope: 103 mV dec <sup>-1</sup>                                                                    |                                                                                                               |           |
| WC nanowires                                                           | $j_0$ : 6.8*10 <sup>-4</sup> mA cm <sup>-2</sup> Tafel slop: 82 mV dec <sup>-1</sup>                                           | Electrolyte: 0.5 M H <sub>2</sub> SO <sub>4</sub> ; Scan rate: 5 mV s <sup>-1</sup>                           | 9         |
| W <sub>4</sub> MoC nanowire:                                           | $j_0$ : 2.9*10 <sup>-2</sup> mA cm <sup>-2</sup> Tafel slop: 52 mV dec <sup>-1</sup>                                           |                                                                                                               |           |
| 70M2S/30WC-Graphene                                                    | $\eta_0$ : 110 mV; Tafel slope: 41 mV dec <sup>-1</sup>                                                                        | Electrolyte: 0.5 M H <sub>2</sub> SO <sub>4</sub>                                                             | 10        |
| $\beta$ -Mo <sub>0.06</sub> W <sub>0.94</sub> C/CB                     | $j_{\eta=290\text{ mV}}$ : 27 mA; $\eta_{j=1\text{ mA}}$ : 156 mV                                                              | Electrolyte: H <sub>2</sub> -saturated 0.5 M H <sub>2</sub> SO <sub>4</sub> ; Scan rate: 2 mV s <sup>-1</sup> | 11        |
| $\alpha$ -WC/CB                                                        | $j_{\eta=290\text{ mV}}$ : 21 mA; $\eta_{j=1\text{ mA}}$ : 165 mV                                                              |                                                                                                               |           |
| WC                                                                     | $\eta_0$ : 184 mV; $\eta_{20}$ : 444 mV                                                                                        | Electrolyte: 0.1 M H <sub>2</sub> SO <sub>4</sub> ; Scan rate: 5 mV s <sup>-1</sup>                           | 12        |
| WC                                                                     | $\eta_0 \approx 244$ mV; $j_{344\text{ mV}}$ : 0.725 mA cm <sup>-2</sup> ; Tafel slope: 137.1 mV dec <sup>-1</sup>             | Electrolyte: 0.1 M HClO <sub>4</sub> ; Scan rate: 2 mV s <sup>-1</sup>                                        | 13        |
| Carbon coated cobalt–tungsten carbide Co <sub>6</sub> W <sub>6</sub> C | $\eta$ : 200 mV; Tafel slope: 75 mV dec <sup>-1</sup> ; $j_0$ : 0.0286 mA cm <sup>-2</sup>                                     | Electrolyte: 0.5 M H <sub>2</sub> SO <sub>4</sub> Scan rate: 50 mV s <sup>-1</sup>                            | 14        |
| WC-WN decorated graphene                                               | $\eta_{10}$ : 105 mV; Tafel slope: 36 mV dec <sup>-1</sup> ; $j_0$ : 0.063 mA cm <sup>-2</sup>                                 | Electrolyte: H <sub>2</sub> -bubbled 0.1 M HClO <sub>4</sub>                                                  | 15        |
| Fe-WCN                                                                 | $\eta_0$ : 100 mV; $\eta_{10}$ : 220 mV; Tafel slope: 47.1 mV dec <sup>-1</sup>                                                | Electrolyte: H <sub>2</sub> SO <sub>4</sub> (pH 1); Scan rate=5 mV s <sup>-1</sup>                            | 16        |
| CNS@WC/GF                                                              | $\eta_{10}$ : 65 mV; Tafel slope: 61 mV dec <sup>-1</sup> ; $j_0$ : 7.58 × 10 <sup>-2</sup> mA cm <sup>-2</sup>                | Electrolyte: 1 M H <sub>2</sub> SO <sub>4</sub> ; Scan rate: 2 mV s <sup>-1</sup>                             | This work |

**Table S2** Summary of catalytic performance of tungsten carbide-based HER catalysts in alkaline solutions

| Sample                                                                 | Catalytic performance                                                                                                  | Experimental conditions                                                | Ref.      |
|------------------------------------------------------------------------|------------------------------------------------------------------------------------------------------------------------|------------------------------------------------------------------------|-----------|
| WC-CNTs                                                                | $\eta_0$ : 16 mV; $\eta_{10}$ : 137 mV; $j_{300}$ mV: 33.1 mA cm <sup>-2</sup> ; Tafel slope: 106 mV dec <sup>-1</sup> | Electrolyte: 0.1 M KOH;<br>Scan rate: 50 mV s <sup>-1</sup>            | 3         |
| WC/flake Ni                                                            | $j_0$ : 4.02 *10 <sup>-4</sup> A cm <sup>-2</sup> ; Tafel slop: 133 mV dec <sup>-1</sup>                               | Electrolyte: 6 M KOH;<br>Scan rate: 5 mV s <sup>-1</sup>               | 8         |
| WC/foam Ni                                                             | $j_0$ : 4.22*10 <sup>-4</sup> A cm <sup>-2</sup> ; Tafel slop: 125 mV dec <sup>-1</sup>                                |                                                                        | 8         |
| Carbon coated cobalt–tungsten carbide Co <sub>6</sub> W <sub>6</sub> C | $\eta_{10}$ : 73 mV; Tafel slope:25 mV dec <sup>-1</sup> ; $j_0$ : 0.0412 mA cm <sup>-2</sup>                          | Electrolyte: 1 M KOH;<br>Scan rate: 50 mV s <sup>-1</sup>              | 14        |
| Fe-WCN                                                                 | $\eta_0$ : 120 mV; $\eta_{10}$ : 250 mV;<br>Tafel slope: 47.1 mV dec <sup>-1</sup>                                     | Electrolyte: alkaline medium (pH: 13); Scan rate: 5 mV s <sup>-1</sup> | 16        |
| CNS@WC/GF                                                              | $\eta_{10}$ : 68 mV; Tafel slope: 72 mV dec <sup>-1</sup> ; $j_0$ : 5.37 × 10 <sup>-2</sup> mA cm <sup>-2</sup>        | Electrolyte: 1 M KOH;<br>Scan rate: 2 mV s <sup>-1</sup>               | This work |

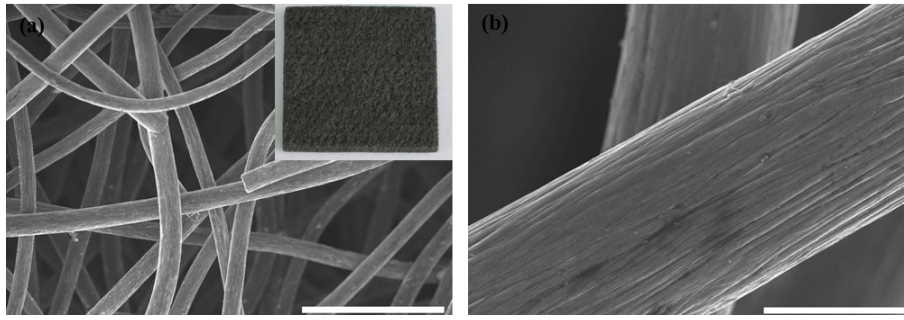

**Fig. S1** FESEM micrographs of pristine carbon felt (Inset in (a) is an optical image of a piece of  $5 \times 5 \times 0.5$  cm carbon felt sheet.) Scale bars, 100  $\mu\text{m}$  (a), 10  $\mu\text{m}$  (b)

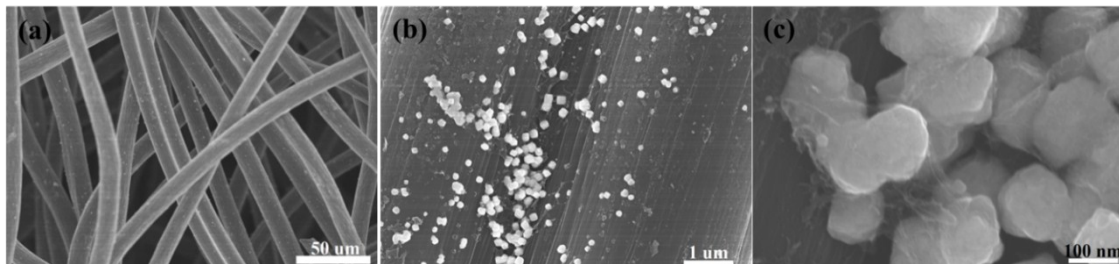

**Fig. S2** FESEM micrographs of CNS@WC/GF with various magnifications.

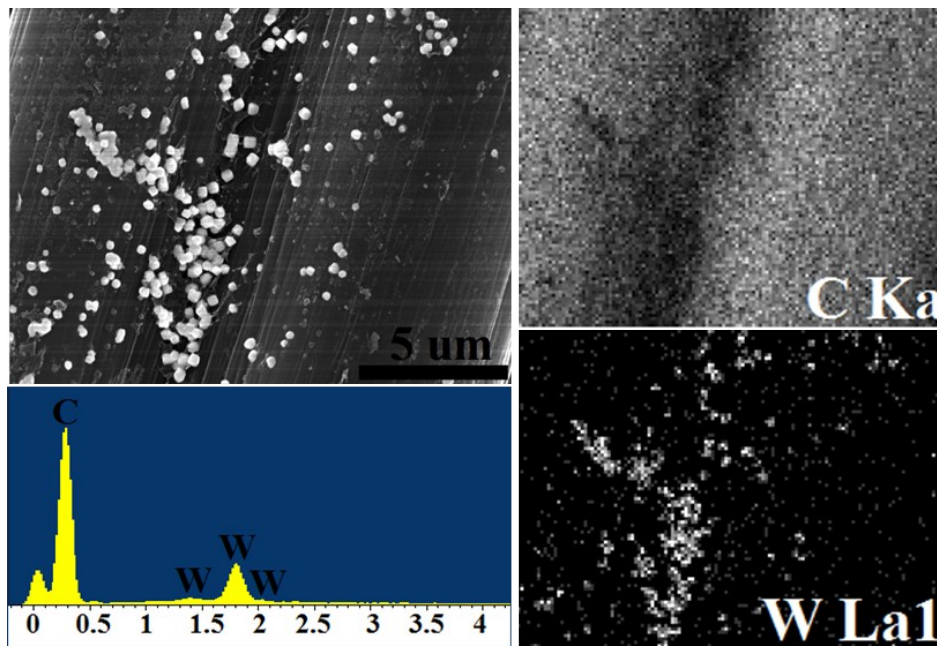

**Fig. S3** EDX analyses of CNS@WC/GF.

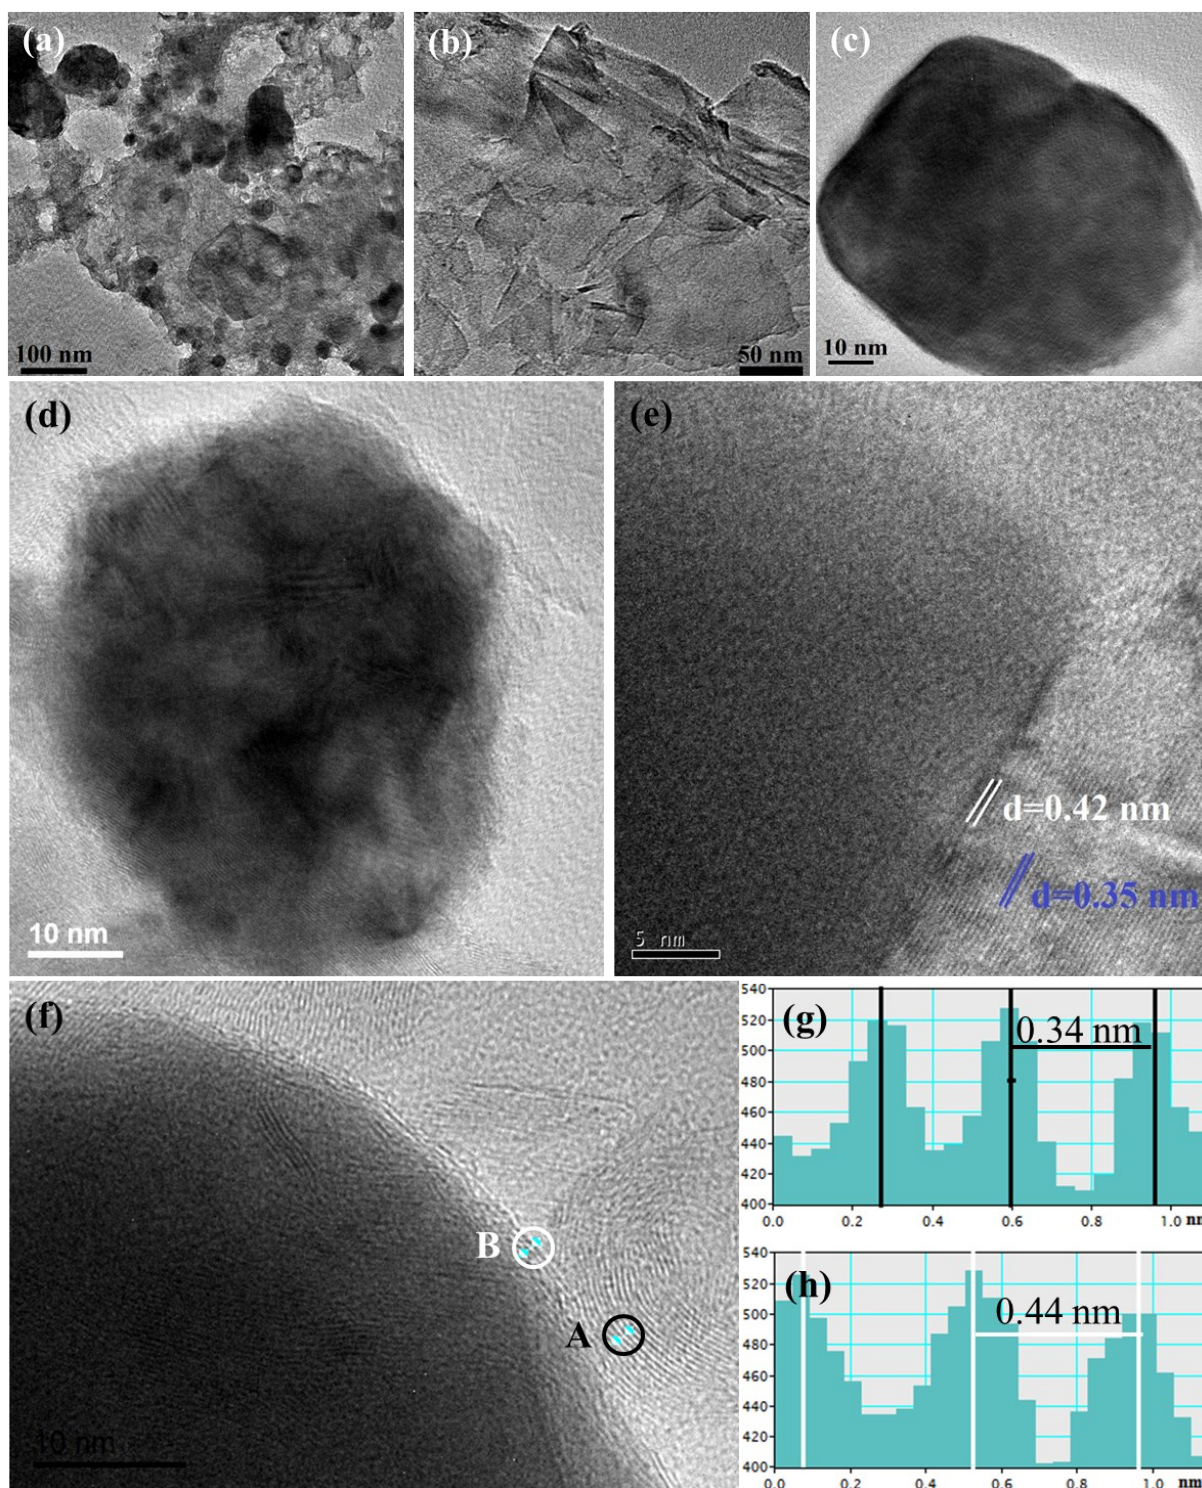

**Fig. S4** TEM micrographs of CNS@WC/GF (a), CNS (b), CNS@WC nanoparticles (c, d), high-resolution TEM micrographs (e, f) and the corresponding line profiles (g, h) of spots A and B in (c).

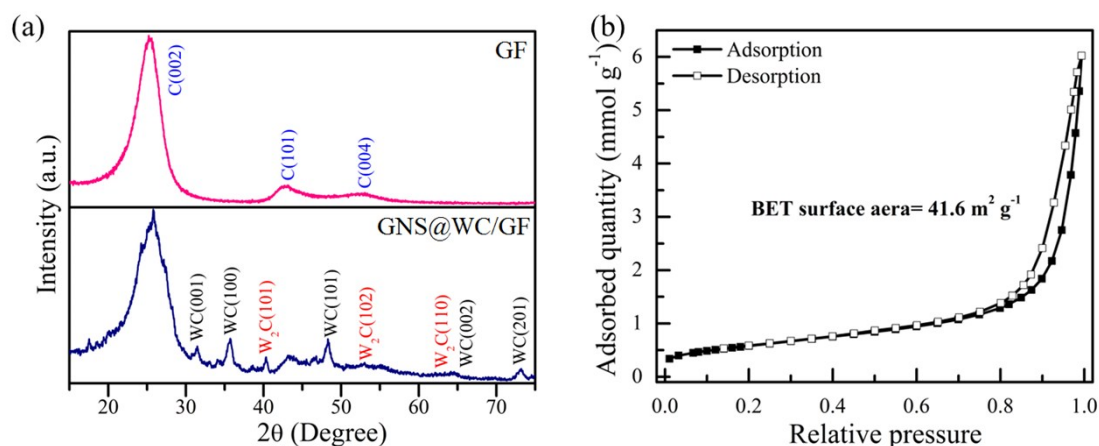

**Fig. S5** XRD patterns of GF and CNS@WC/GF (a), and N<sub>2</sub> absorption-desorption isotherm of CNS@WC/GF.

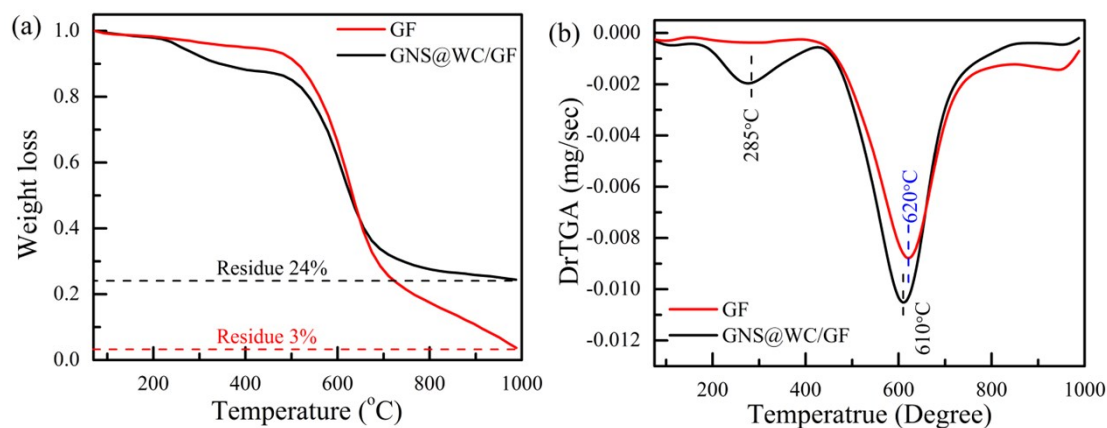

**Fig. S6** TGA (a) and derivative TGA (b) curves of GF and CNS@WC/GF.

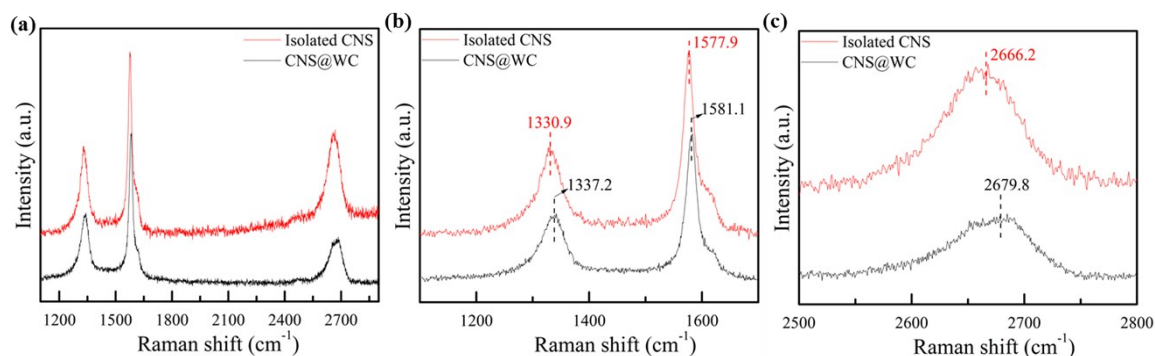

**Fig. S7** Raman spectra of isolated carbon nanosheets and CNS@WC, (a) overall view, (b) D and G bands, and (c) 2D band.

**Table R1** Results of Raman analysis (For each sample, at least five tests were conducted at different locations. The average values together with standard deviations are presented. The intensity values were obtained by integrating the corresponding peaks.

| Sample | D band   |             |        | G band   |             |        | 2D band  |             |        | $I_G/I_{2D}$ |
|--------|----------|-------------|--------|----------|-------------|--------|----------|-------------|--------|--------------|
|        | Positon  | Intensity   | fwhm   | Positon  | Intensity   | fwhm   | Positon  | Intensity   | fwhm   |              |
| CNS    | 1331±4.6 | 248699±5296 | 54±2.1 | 1577±7.6 | 262322±6211 | 19±2.2 | 2664±3.8 | 440661±9002 | 75±2.3 | 0.6          |
| CNS@WC | 1336±5.2 | 165441±7483 | 53±1.2 | 1580±3.1 | 176915±6589 | 18±1.4 | 2678±6.7 | 225115±8113 | 92±2.1 | 0.8          |

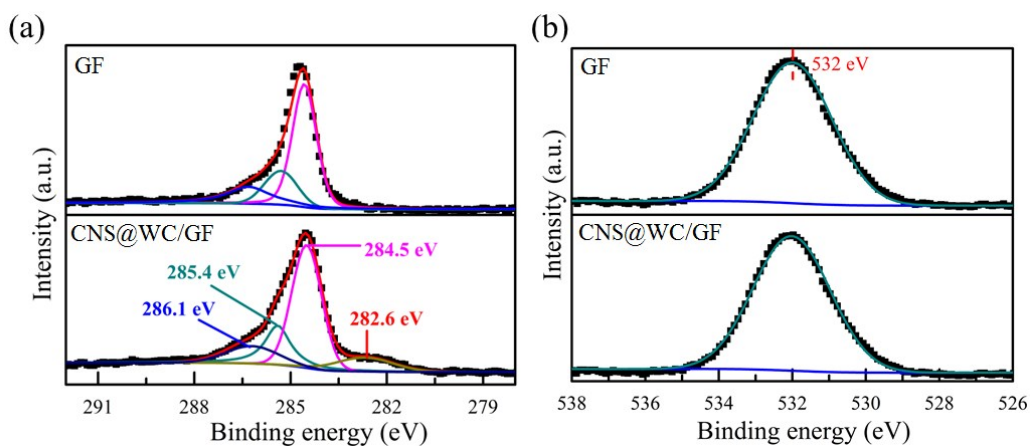

**Fig. S8** XPS spectra of C 1s (a), and O 1s (b) of GF and CNS@WC/GF.

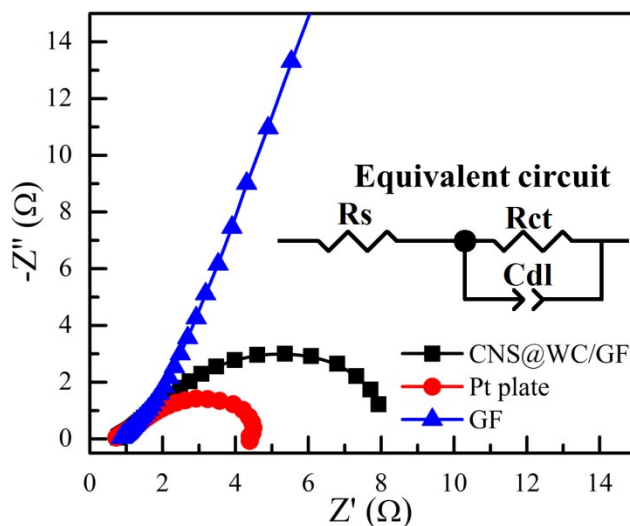

**Fig. S9** Nyquist plots of catalysts and the equivalent circuit

## Reference

1. Y. Shen, A. C. Lua, *Appl. Catal., B* 2015, 164, 61–69
2. Y. Shen, A. C. Lua, J. Xi, X. Qiu, *ACS Appl. Mater. Interfaces* DOI: 10.1021/acsami.5b11966
3. X. J. Fan, H. Q. Zhou, X. Guo, *ACS Nano* 2015, 9, 5125-5134
4. H. L. Fei, Y. Yang, X. J. Fan, G. Wang, G. D. Ruan, J. M. Tour, *J. Mater. Chem. A* 2015, 3, 5798–5804
5. W.-F. Chen, J. M. Schneider, K. Sasaki, C.-H. Wang, J. Schneider, S. Iyer, S. Iyer, Y. M. Zhu, J. T. Muckerman, E. Fujita, *ChemSusChem* 2014, 7, 2414–2418
6. C. Y. Tang, D. Z. Wang, Z. Z. Wu, B. H. Duan, *Int. J. Hydrogen Energy* 2015, 40, 3229-3237



7. J.-F. Lin, O. Pitkanen, J. Maklin, R. Puskas, A. Kukovecz, A. Dombovari, G. Toth, K. Kordas, *J. Mater. Chem. A*, 2015,3, 14609–14616
8. H. J. Zheng, J. G. Huang, W. Wang, C. N. Ma, *Electrochem. Commun.* 2005, 7 1045–1049
9. P. Xiao, X. M. Ge, H. B. Wang, Z. L. Liu, A. Fisher, and X. Wang, *Adv. Funct. Mater.* 2015, 25, 1520–1526
10. Y. Yan, B. Y. Xia, X. Y. Qi, H. B. Wang, R. Xu, J.-Y. Wang, H. Zhang and X. Wang, *Chem. Commun.* 2013, 49, 4884–4886
11. S. T. Hunt, T. Nimmanwudipong, Y. Romn-Leshkov, *Angew. Chem. Int. Ed.* 2014, 53, 5131–5136
12. S. Wirth, F. Harnisch, M. Weinmann, U. Schröder, *Appl. Catal. B*, 2012, 126, 225–230
13. Y. N. Regmi, G. R. Waetzig, K. D. Duffee, S. M. Schmuecker, J. M. Thode and B. M. Leonard, *J. Mater. Chem. A*, 2015, 3, 10085–10091
14. Y. P. Liu, G.-D. Li, L. Yuan, L. Ge, H. Ding, D. J. Wang and X. X. Zou, *Nanoscale* 2015, 7, 3130–3136
15. F. K. Meng, E. Y. Hu, L. H. Zhang, K. Sasaki, J. T. Muckerman and E. Fujita. *J. Mater. Chem. A*, 2015, 3, 18572–18577
16. Y. Zhao, K. Kamiya, K. Hashimoto, S. Nakanishi, *Angew. Chem. Int. Ed.* 2013, 52, 13638–13641
